# Supplementary material
Source: PubMed Central journal article supplement (PMC4715366)
Supplement: NIHMS722591-supplement-supplement_1.pdf [file NIHMS722591-supplement-supplement_1.pdf]

Supplemental Table 1. Census SEP indicators used to calculate the SDI.

| Candidate SEP variables (n = 20)<br>Source: US Census American Communities Survey (2005-2009)                   | Retained in<br>Spatially-<br>Stratified<br>PCA | Retained in<br>City-wide<br>PCA |
|-----------------------------------------------------------------------------------------------------------------|------------------------------------------------|---------------------------------|
| Education (among adults aged > 25)                                                                              |                                                |                                 |
| % < High School                                                                                                 |                                                |                                 |
| % BA or more                                                                                                    | X                                              |                                 |
| Employment (among adult labor force, aged 20-64)                                                                |                                                |                                 |
| % unemployed                                                                                                    | X                                              | X                               |
| % males in labor force                                                                                          |                                                |                                 |
| % females in labor force                                                                                        |                                                |                                 |
| Housing                                                                                                         |                                                |                                 |
| % renter occupied (among occupied units)                                                                        |                                                |                                 |
| % vacant housing units (among total housing units)                                                              |                                                |                                 |
| % crowded (> 1 occupant per room, among occupied housing units)                                                 | X                                              | X                               |
| Occupation (among full-time, year-round civilian employed population)                                           |                                                |                                 |
| % adults in management or professional occupations                                                              | X                                              |                                 |
| Income                                                                                                          |                                                |                                 |
| % households in poverty (< 200% Federal Poverty Line)                                                           | X                                              |                                 |
| % Families w/ annual income < \$35,000 (2009 inflation-adjusted)                                                |                                                |                                 |
| % female householders with children aged < 18                                                                   |                                                |                                 |
| % households w/ public assistance income                                                                        | X                                              |                                 |
| % households w/ Food Stamp benefits (in past 12 months)                                                         |                                                |                                 |
| Median household income (in the past 12 months)                                                                 |                                                |                                 |
| % renter or owner housing costs in excess of 30% household income (in past 12 months)                           |                                                | X                               |
| Racial composition                                                                                              |                                                |                                 |
| % African American (non-Hispanic)                                                                               |                                                | X                               |
| % non-White (calculated as 1 - % non-Hispanic White population)                                                 | X                                              |                                 |
| % Hispanic                                                                                                      |                                                |                                 |
| Language                                                                                                        |                                                |                                 |
| % speak English less than "very well" (among pop > 5 years old who speak a language other than English at home) |                                                |                                 |

Supplemental Table 2. Model 1 linear coefficient estimates for change in birth weight (g) for covariates.

| Covariates                     | Change in birth weight (g) | 95% CIs        |
|--------------------------------|----------------------------|----------------|
| Intercept                      | 2773.4                     | 2746.2, 2800.6 |
| <b>Ethnicity</b>               |                            |                |
| US-born White [REF]            | --                         | --             |
| Foreign-born White             | 5.7                        | -1.2, 12.6     |
| US-born Black                  | -113.8                     | -121.2, -106.3 |
| Foreign-born Black             | -78.5                      | -86.3, -70.8   |
| US-born Hispanic               | -38.2                      | -45.4, -30.9   |
| Foreign-born Hispanic          | -1.4                       | -8.1, 5.3      |
| US-born Asian                  | -104.5                     | -120.3, -88.6  |
| Foreign-born Asian             | -87.7                      | -94.5, -80.8   |
| <b>Maternal education</b>      |                            |                |
| < 9 yrs. [REF]                 | --                         | --             |
| 9 - 11 yrs.                    | 12.2                       | 10.1, 25.6     |
| 12 yrs. (High school)          | 17.5                       | 41.0, 57.1     |
| 13 - 15 yrs.                   | 34.7                       | 57.2, 74.2     |
| 16 yrs. (BA)                   | 36.9                       | 66.1, 84.4     |
| > 16 yrs.                      | 36.1                       | 50.8, 73.6     |
| <b>Medicaid status</b>         |                            |                |
| No [REF]                       | --                         | --             |
| Yes                            | 1.5                        | 4.9, 19.5      |
| <b>Maternal age (years)</b>    |                            |                |
| < 20 [REF]                     | --                         | --             |
| 20 - < 25                      | 17.8                       | 10.4, 24.6     |
| 25 - < 30                      | 49.0                       | 27.3, 42.1     |
| 30 - < 35                      | 65.7                       | 28.6, 45.3     |
| 35 - < 40                      | 75.2                       | 27.0, 45.2     |
| ≥ 40                           | 62.2                       | -3.0, 5.9      |
| <b>Pre-pregnancy BMI</b>       |                            |                |
| < 18.5 (Underweight) [REF]     | --                         | --             |
| 18.5 - < 25 (Normal)           | 95.3                       | 87.8, 102.8    |
| 25 - < 30 (Overweight)         | 159.7                      | 151.6, 167.8   |
| ≥ 30 (Obese)                   | 215.5                      | 207.0, 224.0   |
| <b>Prenatal care received</b>  |                            |                |
| No [REF]                       | --                         | --             |
| Yes                            | 32.2                       | 9.1, 55.2      |
| <b>Previous live births</b>    |                            |                |
| 0 [REF]                        | --                         | --             |
| 1                              | 68.4                       | 64.3, 72.5     |
| 2                              | 77.2                       | 71.6, 82.8     |
| ≥ 3                            | 76.9                       | 70.3, 83.5     |
| <b>Gestational age (weeks)</b> |                            |                |
| 37 [REF]                       | --                         | --             |
| 38                             | 198.8                      | 191.7, 205.8   |
| 39                             | 347.5                      | 341.0, 354.0   |
| 40                             | 454.8                      | 448.2, 461.5   |
| 41                             | 585.9                      | 577.7, 594.1   |
| 42                             | 648.5                      | 627.6, 669.4   |
| <b>Conception season</b>       |                            |                |
| Dec - Feb [REF]                | --                         | --             |
| Mar - May                      | -11.7                      | -16.9, -6.5    |
| Jun - Aug                      | -17.8                      | -23.4, -12.2   |
| Sep - Nov                      | -30.4                      | -38.9, -22.0   |
| <b>Conception year</b>         |                            |                |
| 2007 [REF]                     | --                         | --             |
| 2008                           | 1.4                        | -3.6, 6.4      |

|      |      |           |
|------|------|-----------|
| 2009 | 4.4  | -0.6, 9.3 |
| 2010 | -2.3 | -7.1, 2.4 |

Supplemental Table 3. Sensitivity analysis for modification of the NO<sub>2</sub>-birth weight association by maternal SEP variables: educational attainment, Medicaid status, and ethnicity. Linear coefficient estimates for change in birth weight (g) of model covariates. Modification term coefficient estimates and 95% CIs shown have been combined to the referent category, reflecting the total estimate for each category.

| Model                                                                      | NO <sub>2</sub> * Maternal Education |                | NO <sub>2</sub> * Medicaid Status |                | NO <sub>2</sub> * Maternal Ethnicity |                |
|----------------------------------------------------------------------------|--------------------------------------|----------------|-----------------------------------|----------------|--------------------------------------|----------------|
| Covariates                                                                 | Change in birth weight (g)           | 95% CIs        | Change in birth weight (g)        | 95% CIs        | Change in birth weight (g)           | 95% CIs        |
| Intercept                                                                  | 2818.2                               | 2767.9, 2868.4 | 2811.2                            | 2780.3, 2842.1 | 2817.0                               | 2784.2, 2849.8 |
| NO <sub>2</sub> exposure (per 10 ppb) stratified by maternal SEP variables |                                      |                |                                   |                |                                      |                |
| NO <sub>2</sub> * Maternal Education                                       |                                      |                |                                   |                |                                      |                |
| < 9 yrs.                                                                   | -16.4                                | -31.9, -0.8    | --                                | --             | --                                   | --             |
| 9 - 11 yrs.                                                                | -5.0                                 | -25.5, 15.5    | --                                | --             | --                                   | --             |
| 12 yrs. (High school)                                                      | -6.8                                 | -24.3, 10.7    | --                                | --             | --                                   | --             |
| 13 - 15 yrs.                                                               | -17.6                                | -33.6, -1.6    | --                                | --             | --                                   | --             |
| 16 yrs. (BA)                                                               | -10.1                                | -23.7, 3.5     | --                                | --             | --                                   | --             |
| > 16 yrs.                                                                  | -12.8                                | -24.6, -1.0    | --                                | --             | --                                   | --             |
| NO <sub>2</sub> * Medicaid status                                          |                                      |                |                                   |                |                                      |                |
| No                                                                         | --                                   | --             | -14.0                             | -19.3, -8.7    | --                                   | --             |
| Yes                                                                        | --                                   | --             | -6.6                              | -13.1, -0.1 *  | --                                   | --             |
| NO <sub>2</sub> * Ethnicity                                                |                                      |                |                                   |                |                                      |                |
| US-born White                                                              | --                                   | --             | --                                | --             | -15.8                                | -22.4, -9.2    |
| Foreign-born White                                                         | --                                   | --             | --                                | --             | -4.9                                 | -14.1, 4.3 *   |
| US-born Black                                                              | --                                   | --             | --                                | --             | -15.4                                | -28.5, -2.3    |
| Foreign-born Black                                                         | --                                   | --             | --                                | --             | -16.5                                | -30.1, -2.9    |
| US-born Hispanic                                                           | --                                   | --             | --                                | --             | -14.8                                | -25.8, -3.8    |
| Foreign-born Hispanic                                                      | --                                   | --             | --                                | --             | -11.6                                | -21.2, -2.0    |
| US-born Asian                                                              | --                                   | --             | --                                | --             | -11.9                                | -32.8, 9.0     |
| Foreign-born Asian                                                         | --                                   | --             | --                                | --             | -0.3                                 | -9.6, 9.0 **   |
| Covariate main effects                                                     |                                      |                |                                   |                |                                      |                |
| Ethnicity                                                                  |                                      |                |                                   |                |                                      |                |
| US-born White [REF]                                                        | --                                   | --             | --                                | --             | --                                   | --             |
| Foreign-born White                                                         | 5.3                                  | -1.6, 12.2     | 5.2                               | -1.7, 12.1     | -24.4                                | -53.5, 4.7     |
| US-born Black                                                              | -114.3                               | -121.8, -106.9 | -114.4                            | -121.9, -107.0 | -116.8                               | -152.1, -81.6  |
| Foreign-born Black                                                         | -79.4                                | -87.1, -71.6   | -79.4                             | -87.2, -71.7   | -79.3                                | -118.3, -40.4  |
| US-born Hispanic                                                           | -38.5                                | -45.8, -31.3   | -38.7                             | -46.0, -31.5   | -42.2                                | -75.8, -8.6    |
| Foreign-born Hispanic                                                      | -1.8                                 | -8.5, 4.9      | -2.0                              | -8.7, 4.7      | -14.0                                | -44.5, 16.5    |
| US-born Asian                                                              | -105.0                               | -120.8, -89.1  | -104.9                            | -120.8, -89.0  | -116.0                               | -181.4, -50.7  |
| Foreign-born Asian                                                         | -88.5                                | -95.4, -81.6   | -88.7                             | -95.5, -81.8   | -130.6                               | -160.1, -101.1 |
| Maternal education                                                         |                                      |                |                                   |                |                                      |                |
| < 9 yrs. [REF]                                                             | --                                   | --             | --                                | --             | [REF]                                | [REF]          |
| 9 - 11 yrs.                                                                | -18.4                                | -66.6, 29.7    | 12.2                              | 4.9, 19.5      | 12.1                                 | 4.8, 19.5      |
| 12 yrs. (High school)                                                      | -8.1                                 | -54.1, 37.9    | 17.5                              | 10.5, 24.6     | 17.4                                 | 10.3, 24.5     |
| 13 - 15 yrs.                                                               | 37.0                                 | -8.4, 82.4     | 34.7                              | 27.3, 42.1     | 34.5                                 | 27.1, 42.0     |
| 16 yrs. (BA)                                                               | 19.8                                 | -25.3, 64.9    | 37.0                              | 28.7, 45.4     | 37.1                                 | 28.7, 45.4     |
| > 16 yrs.                                                                  | 26.6                                 | -19.7, 72.8    | 36.3                              | 27.1, 45.4     | 35.9                                 | 26.7, 45.0     |
| Medicaid status                                                            |                                      |                |                                   |                |                                      |                |
| No [REF]                                                                   | --                                   | --             | --                                | --             | --                                   | --             |
| Yes                                                                        | 1.4                                  | -3.0, 5.9      | -17.7                             | -37.4, 2.0     | 1.8                                  | -2.7, 6.2      |
| Maternal age (years)                                                       |                                      |                |                                   |                |                                      |                |
| < 20 [REF]                                                                 | --                                   | --             | --                                | --             | --                                   | --             |
| 20 - < 25                                                                  | 17.8                                 | 10.0, 25.6     | 17.8                              | 10.0, 25.6     | 17.8                                 | 10.0, 25.6     |
| 25 - < 30                                                                  | 49.0                                 | 41.0, 57.1     | 49.0                              | 41.0, 57.1     | 49.1                                 | 41.1, 57.2     |
| 30 - < 35                                                                  | 65.8                                 | 57.3, 74.3     | 65.8                              | 57.3, 74.3     | 65.9                                 | 57.4, 74.4     |
| 35 - < 40                                                                  | 75.3                                 | 66.2, 84.5     | 75.4                              | 66.3, 84.6     | 75.5                                 | 66.3, 84.6     |
| ≥ 40                                                                       | 62.4                                 | 51.0, 73.8     | 62.4                              | 51.0, 73.8     | 62.6                                 | 51.2, 74.1     |
| Pre-pregnancy BMI                                                          |                                      |                |                                   |                |                                      |                |
| < 18.5 (Underweight) [REF]                                                 | --                                   | --             | --                                | --             | --                                   | --             |

|                         |       |              |       |              |       |              |
|-------------------------|-------|--------------|-------|--------------|-------|--------------|
| 18.5 - < 25 (Normal)    | 95.3  | 87.8, 102.8  | 95.3  | 87.8, 102.8  | 95.5  | 88.0, 103.0  |
| 25 - < 30 (Overweight)  | 159.7 | 151.6, 167.8 | 159.7 | 151.6, 167.7 | 159.9 | 151.8, 167.9 |
| ≥ 30 (Obese)            | 215.6 | 207.1, 224.1 | 215.5 | 207.0, 224.0 | 215.6 | 207.1, 224.1 |
| Prenatal care received  |       |              |       |              |       |              |
| No [REF]                | --    | --           | --    | --           | --    | --           |
| Yes                     | 31.9  | 8.9, 55.0    | 32.0  | 8.9, 55.0    | 32.0  | 8.9, 55.0    |
| Previous live births    |       |              |       |              |       |              |
| 0 [REF]                 | --    | --           | --    | --           | --    | --           |
| 1                       | 68.4  | 64.3, 72.5   | 68.3  | 64.2, 72.4   | 68.4  | 64.3, 72.5   |
| 2                       | 77.2  | 71.6, 82.8   | 77.1  | 71.6, 82.7   | 77.2  | 71.7, 82.8   |
| ≥ 3                     | 76.8  | 70.1, 83.4   | 76.7  | 70.1, 83.4   | 76.7  | 70.0, 83.3   |
| Gestational age (weeks) |       |              |       |              |       |              |
| 37 [REF]                | --    | --           | --    | --           | --    | --           |
| 38                      | 198.8 | 191.7, 205.8 | 198.8 | 191.7, 205.8 | 198.7 | 191.7, 205.7 |
| 39                      | 347.5 | 341.0, 354.0 | 347.5 | 341.0, 354.0 | 347.5 | 341.0, 354.0 |
| 40                      | 454.8 | 448.1, 461.4 | 454.8 | 448.2, 461.5 | 454.7 | 448.1, 461.4 |
| 41                      | 585.9 | 577.7, 594.1 | 585.9 | 577.7, 594.1 | 585.8 | 577.6, 594.0 |
| 42                      | 648.4 | 627.5, 669.3 | 648.4 | 627.5, 669.4 | 648.3 | 627.4, 669.2 |
| Conception season       |       |              |       |              |       |              |
| Dec - Feb [REF]         | --    | --           | --    | --           | --    | --           |
| Mar - May               | 1.4   | -3.6, 6.4    | 1.4   | -3.6, 6.4    | 1.3   | -3.6, 6.3    |
| Jun - Aug               | 4.5   | -0.4, 9.5    | 4.4   | -0.5, 9.4    | 4.6   | -0.4, 9.5    |
| Sep - Nov               | -2.2  | -6.9, 2.5    | -2.3  | -7.0, 2.4    | -2.1  | -6.9, 2.6    |
| Conception year         |       |              |       |              |       |              |
| 2007 [REF]              | --    | --           | --    | --           | --    | --           |
| 2008                    | -12.0 | -17.2, -6.9  | -11.8 | -17.0, -6.6  | -12.1 | -17.3, -6.9  |
| 2009                    | -18.6 | -24.1, -13.0 | -18.0 | -23.5, -12.4 | -18.8 | -24.4, -13.3 |
| 2010                    | -31.0 | -39.5, -22.6 | -30.3 | -38.7, -21.8 | -31.4 | -39.8, -23.0 |

\*  $p < 0.05$ ; \*\*  $p < 0.01$  for statistical difference from referent category

Supplemental Table 4: Sensitivity analysis for co-pollutant adjustment. Coefficient estimates for change in birth weight (g) for covariates with adjustment for PM<sub>2.5</sub> exposure in Models 1, 2 and 3.

| Covariates                 | Model 1             |                | Model 2             |                | Model 3             |                |
|----------------------------|---------------------|----------------|---------------------|----------------|---------------------|----------------|
|                            | Effect estimate (g) | 95% CIs        | Effect estimate (g) | 95% CIs        | Effect estimate (g) | 95% CIs        |
| Intercept                  | 2773.6              | 2746.1, 2801.0 | 2773.3              | 2745.8, 2800.8 | 2770.0              | 2731.6, 2808.3 |
| Ethnicity                  |                     |                |                     |                |                     |                |
| US-born White [REF]        | --                  | --             | --                  | --             | --                  | --             |
| Foreign-born White         | 5.7                 | -1.2, 12.6     | 5.8                 | -1.1, 12.7     | 5.3                 | -1.5, 12.0     |
| US-born Black              | -113.8              | -121.2, -106.3 | -113.2              | -120.7, -105.8 | -113.7              | -121.0, -106.4 |
| Foreign-born Black         | -78.6               | -86.3, -70.8   | -77.8               | -85.6, -70.1   | -78.0               | -86.2, -70.9   |
| US-born Hispanic           | -38.2               | -45.4, -30.9   | -37.8               | -45.1, -30.6   | -38.3               | -45.4, -31.2   |
| Foreign-born Hispanic      | -1.4                | -8.1, 5.3      | -1.0                | -7.7, 5.7      | -1.6                | -8.2, 5.0      |
| US-born Asian              | -104.4              | -120.3, -88.6  | -104.2              | -120.1, -88.4  | -104.8              | -120.4, -89.2  |
| Foreign-born Asian         | -87.7               | -94.6, -80.8   | -87.5               | -94.3, -80.6   | -88.4               | -95.2, -81.7   |
| Maternal education         |                     |                |                     |                |                     |                |
| < 9 yrs. [REF]             | --                  | --             | --                  | --             | --                  | --             |
| 9 - 11 yrs.                | 12.2                | 4.9, 19.5      | 12.2                | 4.9, 19.5      | 12.2                | 5.0, 19.4      |
| 12 yrs. (High school)      | 17.5                | 10.4, 24.6     | 17.6                | 10.5, 24.6     | 17.5                | 10.5, 24.4     |
| 13 - 15 yrs.               | 34.7                | 27.3, 42.1     | 34.7                | 27.3, 42.2     | 34.6                | 27.4, 41.9     |
| 16 yrs. (BA)               | 36.9                | 28.6, 45.3     | 37.1                | 28.7, 45.4     | 37.0                | 28.9, 45.2     |
| > 16 yrs.                  | 36.1                | 27.0, 45.3     | 36.2                | 27.0, 45.3     | 36.2                | 27.3, 45.2     |
| Medicaid status            |                     |                |                     |                |                     |                |
| No [REF]                   | --                  | --             | --                  | --             | --                  | --             |
| Yes                        | 1.4                 | -3.0, 5.9      | 1.5                 | -3.0, 5.9      | 1.3                 | -3.1, 5.6      |
| Maternal age (years)       |                     |                |                     |                |                     |                |
| < 20 [REF]                 | --                  | --             | --                  | --             | --                  | --             |
| 20 - < 25                  | 17.8                | 10.0, 25.6     | 17.8                | 10.0, 25.5     | 17.7                | 10.1, 25.3     |
| 25 - < 30                  | 49.0                | 40.9, 57.1     | 48.9                | 40.8, 57.0     | 48.9                | 41.0, 56.8     |
| 30 - < 35                  | 65.7                | 57.2, 74.1     | 65.6                | 57.1, 74.0     | 65.6                | 57.3, 73.9     |
| 35 - < 40                  | 75.2                | 66.0, 84.4     | 75.1                | 65.9, 84.2     | 75.2                | 66.2, 84.2     |
| ≥ 40                       | 62.2                | 50.7, 73.6     | 62.0                | 50.6, 73.5     | 62.2                | 51.0, 73.4     |
| Pre-pregnancy BMI          |                     |                |                     |                |                     |                |
| < 18.5 (Underweight) [REF] | --                  | --             | --                  | --             | --                  | --             |
| 18.5 - < 25 (Normal)       | 95.3                | 87.8, 102.8    | 95.3                | 87.8, 102.8    | 95.3                | 87.9, 102.6    |
| 25 - < 30 (Overweight)     | 159.7               | 151.7, 167.8   | 159.7               | 151.6, 167.8   | 159.7               | 151.8, 167.6   |
| ≥ 30 (Obese)               | 215.5               | 207.0, 224.0   | 215.6               | 207.1, 224.1   | 215.6               | 207.2, 223.9   |
| Prenatal care received     |                     |                |                     |                |                     |                |
| No [REF]                   | --                  | --             | --                  | --             | --                  | --             |
| Yes                        | 32.1                | 9.1, 55.2      | 32.2                | 9.2, 55.3      | 32.0                | 9.4, 54.7      |
| Previous live births       |                     |                |                     |                |                     |                |
| 0 [REF]                    | --                  | --             | --                  | --             | --                  | --             |
| 1                          | 68.4                | 64.3, 72.5     | 68.4                | 64.3, 72.5     | 68.4                | 64.3, 72.4     |
| 2                          | 77.2                | 71.6, 82.8     | 77.3                | 71.7, 82.8     | 77.2                | 71.7, 82.7     |
| ≥ 3                        | 76.9                | 70.3, 83.6     | 77.0                | 70.3, 83.6     | 76.8                | 70.3, 83.3     |
| Gestational age (weeks)    |                     |                |                     |                |                     |                |
| 37 [REF]                   | --                  | --             | --                  | --             | --                  | --             |
| 38                         | 198.8               | 191.7, 205.8   | 198.8               | 191.8, 205.8   | 198.8               | 191.9, 205.7   |
| 39                         | 347.5               | 341.0, 354.0   | 347.5               | 341.0, 354.1   | 347.6               | 341.2, 353.9   |
| 40                         | 454.8               | 448.2, 461.5   | 454.9               | 448.3, 461.6   | 454.9               | 448.4, 461.4   |
| 41                         | 585.9               | 577.7, 594.1   | 585.9               | 577.7, 594.1   | 585.9               | 577.9, 593.9   |
| 42                         | 648.5               | 627.6, 669.4   | 648.7               | 627.8, 669.6   | 648.5               | 628.0, 669.0   |
| Conception season          |                     |                |                     |                |                     |                |
| Dec - Feb [REF]            | --                  | --             | --                  | --             | --                  | --             |
| Mar - May                  | 1.4                 | -3.6, 6.4      | 1.3                 | -3.6, 6.3      | 1.5                 | -3.4, 6.4      |
| Jun - Aug                  | 4.3                 | -1.2, 9.7      | 4.2                 | -1.2, 9.7      | 4.7                 | 0.7, 9.9       |
| Sep - Nov                  | -2.4                | -7.4, 2.6      | -2.5                | -7.5, 2.5      | -2.2                | -7.1, 2.7      |

|                 |       |              |       |              |       |              |
|-----------------|-------|--------------|-------|--------------|-------|--------------|
| Conception year |       |              |       |              |       |              |
| 2007 [REF]      | --    | --           | --    | --           | --    | --           |
| 2008            | -11.7 | -17.5, -5.9  | -11.2 | -17.1, -5.4  | -10.7 | -16.4, -5.0  |
| 2009            | -17.9 | -25.1, -10.8 | -17.4 | -24.6, -10.2 | -15.8 | -22.8, -8.8  |
| 2010            | -30.5 | -40.1, -21.0 | -29.8 | -39.5, -20.2 | -27.7 | -37.1, -18.2 |

Supplemental Figure 1. Local indicators of spatial association (LISA) to identify spatial regime boundaries which minimize spill-over – LISA maps of tract-level educational attainment and residential crowding. The LISA statistic quantifies the contribution of each tract-level observation to the global spatial pattern, and identifies statistically significant ‘clusters’ and ‘outliers’ (Anselin 1995). The LISA term  $L_i$  for a given indicator  $y$ , at observation  $i$ , is expressed as:  $L_i = f(y_i, y_{j_i})$ , where  $y_{j_i}$  are ‘neighboring’ areas  $J_i$  of  $i$ . Neighbors were defined using a matrix of first-order contiguous areas. Area  $i$  can thus be characterized as part of a spatial cluster (i.e., areas surrounded by empirically similar areas), or as an outlier (i.e., areas surrounded by empirically different areas), with 95% statistical confidence. We mapped tract-level LISA terms to visualize areas of spatial non-stationarity (i.e., non-random heterogeneity in spatial trend) for each SEP indicator. We then overlaid candidate spatial strata – administrative neighborhood areas ( $n = 34$ ), borough boundaries ( $n = 5$ ), and waterway boundaries – on LISA maps to identify the strata which minimized spill-over (i.e., local cluster boundaries best corresponded with the candidate strata boundaries). Geostatistical analyses and visualization were implemented in ESRI ArcInfo v10 (Redlands, CA).

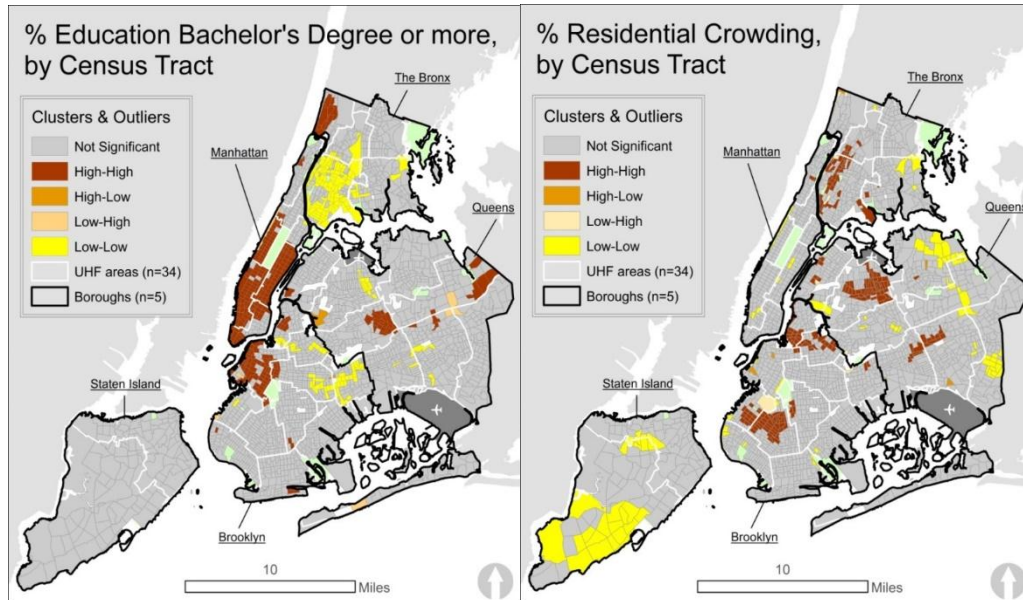



Supplemental Figure 2. Exposure-response functions for NO<sub>2</sub>- and SDI-birth weight associations, adjusted for maternal SEP and covariates (Model 1). Dashed lines indicate 95% confidence intervals.

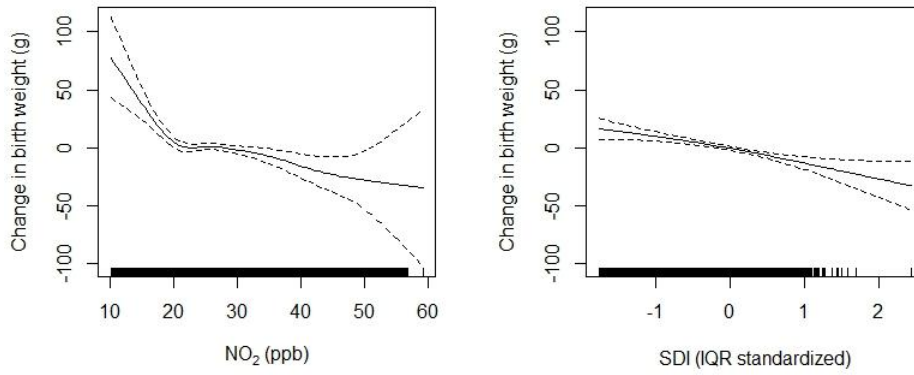

Supplemental Figure 3. Sensitivity analysis for Model 1 co-pollutant adjustment. Exposure-response functions for NO<sub>2</sub>- and SDI-birth weight associations, adjusted for maternal SEP and covariates and for PM<sub>2.5</sub> exposure. Dashed lines indicate 95% confidence intervals.

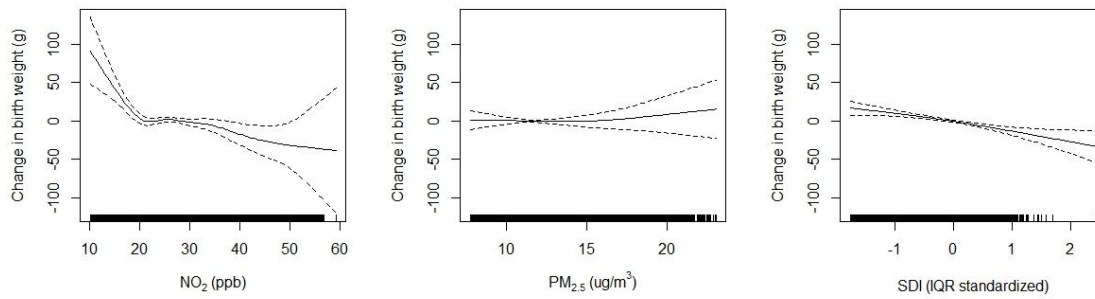

Supplemental Figure 4: Sensitivity analysis for PM<sub>2.5</sub> co-pollutant adjustment (Models 2). Non-linear exposure-response functions for the NO<sub>2</sub>-birth weight association, by SDI levels, adjusted for maternal SEP and covariates (Model 2) and for PM<sub>2.5</sub> exposure. Dashed lines indicate 95% confidence intervals for non-linear association. For comparison, linear NO<sub>2</sub>-birth weight slopes (Model 3) with co-pollutant adjustment for were: -16.8 g (95% CI: -24.1, -8.0), -0.8 g (95% CI: -10.5, 9.0), and -11.7 g (95% CI: -24.3, 2.4) per 10 ppb increase in NO<sub>2</sub>, for the lowest, middle, and highest SDI groups (SDI Q1, SDI Q2 + Q3, and SDI Q4), respectively.

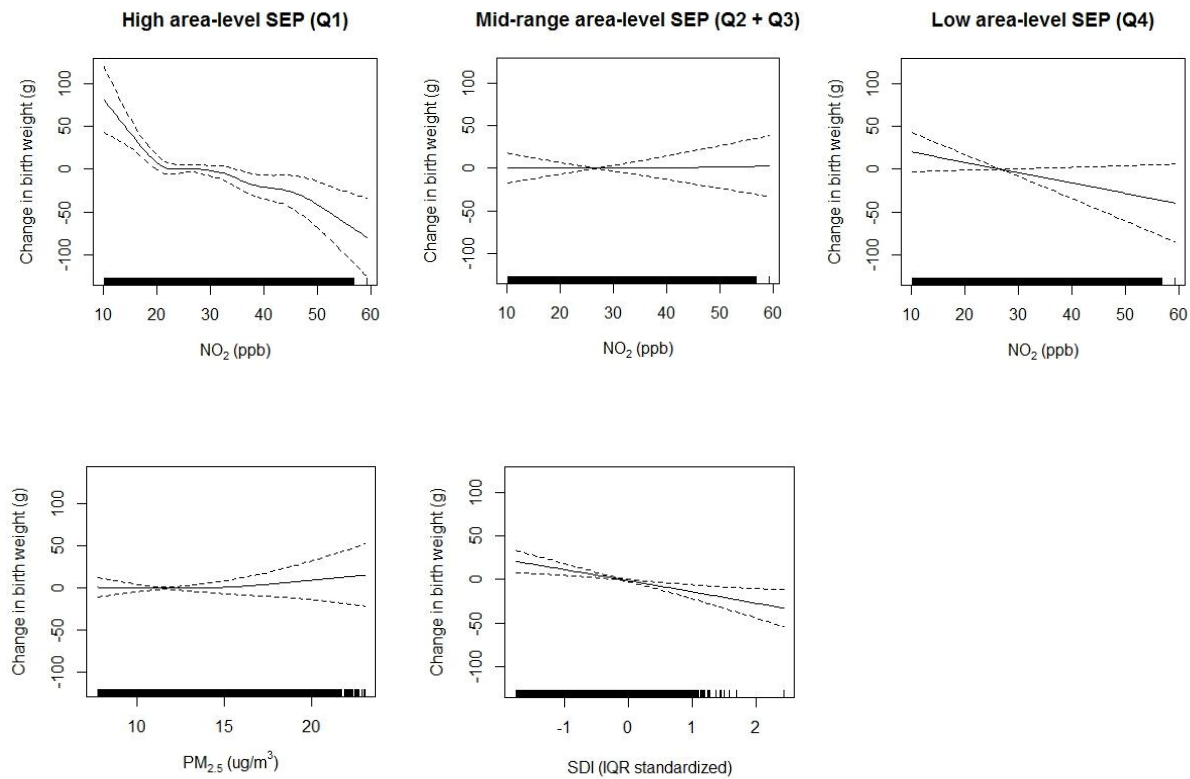

## Highlights

We examined prenatal NO<sub>2</sub> exposure, socioeconomic context and term birth weight.

We observed highest air pollution levels in least-deprived areas of NYC.

NO<sub>2</sub> was associated with lower birth weight in the least- and most-deprived areas.

Complex pattern of exposure complicates interpretation of interaction models.
